# Supplementary material for: Low Level Engraftment and Improvement following a Single Colonoscopic Administration of Fecal Microbiota to Patients with Ulcerative Colitis
Source: PubMed Central journal article supplement (PMC4544847; doi:10.1371/journal.pone.0133925), 2015-08-19
Supplement: pone.0133925.s003.pdf [file pone.0133925.s003.pdf]

# FULL-LENGTH DONOR HISTORY QUESTIONNAIRE

Prescreen #:

Subject #:

RECEIVED  
Human Subjects Division

DEC 05 2012

UW

|       |      |         |         |
|-------|------|---------|---------|
| DATE: |      | STAFF:  |         |
| AGE:  | SEX: | HEIGHT: | WEIGHT: |

|                                                       | Yes                      | No                       |
|-------------------------------------------------------|--------------------------|--------------------------|
| 1. Do you live with the transplant recipient?         | <input type="checkbox"/> | <input type="checkbox"/> |
| 2. What is your relationship to transplant recipient? |                          |                          |

**Are you:**

|                                                                                       |                          |                          |
|---------------------------------------------------------------------------------------|--------------------------|--------------------------|
| 3. Feeling healthy and well today?                                                    | <input type="checkbox"/> | <input type="checkbox"/> |
| 4. Currently taking an antibiotic or have you taken antibiotics in the past 12 weeks? | <input type="checkbox"/> | <input type="checkbox"/> |
| 5. Currently taking any other medication for an infection?                            | <input type="checkbox"/> | <input type="checkbox"/> |

**In the past 48 hours:**

|                                                                                                   |                          |                          |
|---------------------------------------------------------------------------------------------------|--------------------------|--------------------------|
| 6. Have you taken Aspirin or anything that has Aspirin in it?<br><i>- not an exclusion factor</i> | <input type="checkbox"/> | <input type="checkbox"/> |
|---------------------------------------------------------------------------------------------------|--------------------------|--------------------------|

**In the past two weeks:**

|                                                                                                                              |                          |                          |
|------------------------------------------------------------------------------------------------------------------------------|--------------------------|--------------------------|
| 7. Have you taken Steroids (including exogenous glucocorticoids)?                                                            | <input type="checkbox"/> | <input type="checkbox"/> |
| 8. Have you taken Probiotics?                                                                                                | <input type="checkbox"/> | <input type="checkbox"/> |
| 9. Have you taken Immunomodulators (including calcineurin inhibitors)?                                                       | <input type="checkbox"/> | <input type="checkbox"/> |
| 10. Have you taken Biologics?                                                                                                | <input type="checkbox"/> | <input type="checkbox"/> |
| 11. Taken any systemic antineoplastic agents (chemotherapy)?                                                                 | <input type="checkbox"/> | <input type="checkbox"/> |
| 12. <i>If subject has known food allergies:</i> Have you ingested<br>(subject food allergen(s)) _____ in the past two weeks? | <input type="checkbox"/> | <input type="checkbox"/> |
| Note washout period(s), if necessary:                                                                                        |                          |                          |

**In the past 6 weeks:**

|                                                                                                     |                          |                          |                          |
|-----------------------------------------------------------------------------------------------------|--------------------------|--------------------------|--------------------------|
| 13. Female donors: Have you been pregnant or are you pregnant now? <i>- not an exclusion factor</i> | <input type="checkbox"/> | <input type="checkbox"/> | <input type="checkbox"/> |
|                                                                                                     | I am male                |                          |                          |

**In the past 8 weeks:**

|                                                                   |                          |                          |
|-------------------------------------------------------------------|--------------------------|--------------------------|
| 14. Have you had any vaccinations or other shots?                 | <input type="checkbox"/> | <input type="checkbox"/> |
| Have you had contact with someone who had a smallpox vaccination? | <input type="checkbox"/> | <input type="checkbox"/> |

# FULL-LENGTH DONOR HISTORY QUESTIONNAIRE

|              |
|--------------|
| Prescreen #: |
| Subject #:   |

|                                                                                                                                            | Yes                                   | No                       |
|--------------------------------------------------------------------------------------------------------------------------------------------|---------------------------------------|--------------------------|
| <b><i>In the past 12 months have you:</i></b>                                                                                              |                                       |                          |
| 15. Had a transplant such as organ, tissue, or bone marrow?                                                                                | <input type="checkbox"/>              | <input type="checkbox"/> |
| 16. Had a graft such as bone or skin?                                                                                                      | <input type="checkbox"/>              | <input type="checkbox"/> |
| 17. Come into contact with someone else's blood?                                                                                           | <input type="checkbox"/>              | <input type="checkbox"/> |
| 18. Had an accidental needle-stick?                                                                                                        | <input type="checkbox"/>              | <input type="checkbox"/> |
| 19. Had sexual contact with anyone who has HIV/AIDS or has had a positive test for the HIV/AIDS virus?                                     | <input type="checkbox"/>              | <input type="checkbox"/> |
| 20. Had sexual contact with a prostitute or anyone else who takes money or drugs or other payment for sex?                                 | <input type="checkbox"/>              | <input type="checkbox"/> |
| 21. Had sexual contact with anyone who has ever used needles to take drugs or steroids, or anything <u>not</u> prescribed by their doctor? | <input type="checkbox"/>              | <input type="checkbox"/> |
| 22. Had sexual contact with anyone who has hemophilia or has used clotting factor concentrates?                                            | <input type="checkbox"/>              | <input type="checkbox"/> |
| 23. Female donors: Had sexual contact with a male who has ever had sexual contact with another male?                                       | <input type="checkbox"/>              | <input type="checkbox"/> |
|                                                                                                                                            | <input type="checkbox"/><br>I am male |                          |
| 24. Had sexual contact with a person who has hepatitis?                                                                                    | <input type="checkbox"/>              | <input type="checkbox"/> |
| 25. Lived with a person who had hepatitis?                                                                                                 | <input type="checkbox"/>              | <input type="checkbox"/> |
| 26. <b><i>Non-intimate donors:</i></b> Had a tattoo?                                                                                       | <input type="checkbox"/>              | <input type="checkbox"/> |
| 27. <b><i>Non-intimate donors:</i></b> Had ear or body piercing?                                                                           | <input type="checkbox"/>              | <input type="checkbox"/> |
| 28. Had or been treated for syphilis or gonorrhea?                                                                                         | <input type="checkbox"/>              | <input type="checkbox"/> |
| 29. <b><i>Non-intimate donors:</i></b> Been in juvenile detention, lockup, jail, or prison for more than 72 hours?                         | <input type="checkbox"/>              | <input type="checkbox"/> |

|                                                                                                                                                                           |                          |                          |
|---------------------------------------------------------------------------------------------------------------------------------------------------------------------------|--------------------------|--------------------------|
| <b><i>In the past three years have you:</i></b>                                                                                                                           |                          |                          |
| 30. <b><i>Non-intimate donors:</i></b> Been outside the United States or Canada to countries where diarrheal illnesses are endemic or risk of traveler's diarrhea is high | <input type="checkbox"/> | <input type="checkbox"/> |
| Location/Date of travel(s): _____                                                                                                                                         |                          |                          |

|                                                                                                                            |                          |                          |
|----------------------------------------------------------------------------------------------------------------------------|--------------------------|--------------------------|
| <b><i>From 1980 through 1996:</i></b>                                                                                      |                          |                          |
| 31. Did you spend time that adds up to 3 months or more in the United Kingdom?                                             | <input type="checkbox"/> | <input type="checkbox"/> |
| 32. Were you a member of the U.S. military, a civilian military employee, or a dependent of a member of the U.S. military? | <input type="checkbox"/> | <input type="checkbox"/> |

|                                                           |                          |                          |
|-----------------------------------------------------------|--------------------------|--------------------------|
| <b><i>From 1980 to the present, did you:</i></b>          |                          |                          |
| 33. Spend time that adds up to 5 years or more in Europe? | <input type="checkbox"/> | <input type="checkbox"/> |



# FULL-LENGTH DONOR HISTORY QUESTIONNAIRE

|              |
|--------------|
| Prescreen #: |
| Subject #:   |

|                                                                   |                                         | Yes                      | No                       |
|-------------------------------------------------------------------|-----------------------------------------|--------------------------|--------------------------|
| <b>From 1977 to the present, have you:</b>                        |                                         |                          |                          |
| 34. Received money, drugs, or other payment for sex?              |                                         | <input type="checkbox"/> | <input type="checkbox"/> |
| 35. Male donors: Had sexual contact with another male, even once? | <input type="checkbox"/><br>I am female | <input type="checkbox"/> | <input type="checkbox"/> |

| <b>Have you EVER:</b>                                                                                        |  |                          |                          |
|--------------------------------------------------------------------------------------------------------------|--|--------------------------|--------------------------|
| 36. Had a positive test for the HIV/AIDS virus?                                                              |  | <input type="checkbox"/> | <input type="checkbox"/> |
| 37. Used needles to take drugs, steroids, or anything <u>not</u> prescribed by your doctor?                  |  | <input type="checkbox"/> | <input type="checkbox"/> |
| 38. Used clotting factor concentrates?                                                                       |  | <input type="checkbox"/> | <input type="checkbox"/> |
| 39. Had hepatitis?                                                                                           |  | <input type="checkbox"/> | <input type="checkbox"/> |
| 40. Had malaria?                                                                                             |  | <input type="checkbox"/> | <input type="checkbox"/> |
| 41. Had Chagas' disease?                                                                                     |  | <input type="checkbox"/> | <input type="checkbox"/> |
| 42. Had babesiosis?                                                                                          |  | <input type="checkbox"/> | <input type="checkbox"/> |
| 43. Received a dura mater (or brain covering) graft?                                                         |  | <input type="checkbox"/> | <input type="checkbox"/> |
| 44. Had sexual contact with anyone who was born in or lived in Africa?                                       |  | <input type="checkbox"/> | <input type="checkbox"/> |
| 45. Had a relative with Creutzfeldt-Jakob disease?                                                           |  | <input type="checkbox"/> | <input type="checkbox"/> |
| 46. Had inflammatory bowel disease?                                                                          |  | <input type="checkbox"/> | <input type="checkbox"/> |
| 47. Had irritable bowel syndrome, idiopathic chronic constipation, or chronic diarrhea? <i>Specify</i> _____ |  | <input type="checkbox"/> | <input type="checkbox"/> |
| 48. Had a gastrointestinal malignancy or colon polyps?                                                       |  | <input type="checkbox"/> | <input type="checkbox"/> |

| <i>Relative Exclusion Criteria at researchers' discretion</i>                                                                                           |  |                          |                          |
|---------------------------------------------------------------------------------------------------------------------------------------------------------|--|--------------------------|--------------------------|
| 49. Have you ever had the infection <i>Clostridium difficile</i> ("C. Diff")?                                                                           |  | <input type="checkbox"/> | <input type="checkbox"/> |
| 50. Do you have a history of major gastrointestinal surgery?<br>(e.g. gastric by-pass) <i>Specify</i> _____                                             |  | <input type="checkbox"/> | <input type="checkbox"/> |
| 51. Have you been diagnosed with an autoimmune disease?<br>(e.g. multiple sclerosis, connective tissue disease) <i>Specify</i> _____                    |  | <input type="checkbox"/> | <input type="checkbox"/> |
| 52. Have you been diagnosed with atopic diseases?<br>(e.g. asthma, eczema, eosino-hilic disorder of the gastrointestinal tract)<br><i>Specify</i> _____ |  | <input type="checkbox"/> | <input type="checkbox"/> |
| 53. Have you been diagnosed with a chronic pain syndrome?<br>(e.g. chronic fatigue syndrome, fibromyalgia) <i>Specify</i> _____                         |  | <input type="checkbox"/> | <input type="checkbox"/> |
| 54. Do you have diabetes and/or hypertension? <i>Specify</i> _____                                                                                      |  | <input type="checkbox"/> | <input type="checkbox"/> |
| 55. Had any type of cancer, including leukemia? <i>Specify</i> _____                                                                                    |  | <input type="checkbox"/> | <input type="checkbox"/> |
| 56. Had any problems with your heart or lungs? <i>Specify</i> _____                                                                                     |  | <input type="checkbox"/> | <input type="checkbox"/> |
| 57. Had a bleeding condition or a blood disease? <i>Specify</i> _____                                                                                   |  | <input type="checkbox"/> | <input type="checkbox"/> |
