# Supplementary material for: Low Level Engraftment and Improvement following a Single Colonoscopic Administration of Fecal Microbiota to Patients with Ulcerative Colitis
Source: PubMed Central journal article supplement (PMC4544847; doi:10.1371/journal.pone.0133925), 2015-08-19
Supplement: pone.0133925.s004.pdf [file pone.0133925.s004.pdf]

S11 Table: Heatmap of Relative Species Abundance Across all Samples

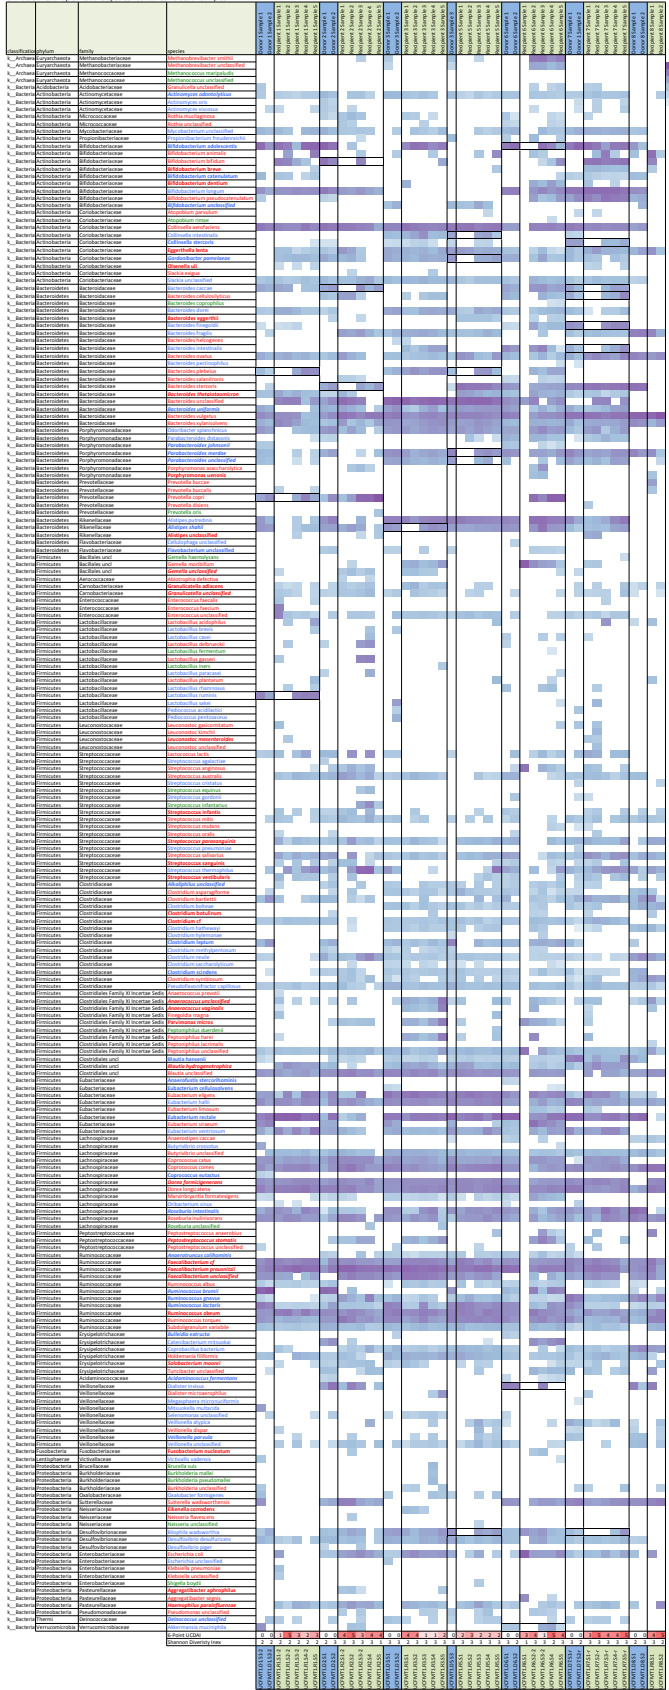

Red text: all species that are higher in abundance in either of the two samples.

Blue text: all species that are higher in abundance in either of the two samples.

Green text: all species that are not detectable in baseline in either OC or healthy samples but that are detected at later timepoints.
